# Supplementary material for: Direct production of XYDMY− sex reversal female medaka (Oryzias latipes) by embryo microinjection of TALENs
Source: PubMed Central journal article supplement (PMC4568496; doi:10.1038/srep14057), 2015-09-14
Supplement: srep14057-s1.pdf [file srep14057-s1.pdf]

**Direct production of XY<sup>DMY</sup>- sex reversal female medaka (*Oryzias latipes*) by embryo  
microinjection of TALENs**

Daji Luo<sup>1,2</sup>, Yun Liu<sup>3</sup>, Ji Chen<sup>2</sup>, Xiaoqin Xia<sup>2</sup>, Mengxi Cao<sup>2</sup>, Bin Cheng<sup>1</sup>, Xuejuan Wang<sup>1</sup>,  
Wuming Gong<sup>4</sup>, Chao Qiu<sup>1</sup>, Yunsheng Zhang<sup>2</sup>, Christopher Hon Ki Cheng<sup>3</sup>, Zuoyan Zhu<sup>2</sup> and  
Wei Hu<sup>2,\*</sup>

<sup>1</sup> Department of Genetics, School of Basic Medical Sciences, Wuhan University, Wuhan, Hubei,  
P. R. China, 430071;

<sup>2</sup> State Key Laboratory of Freshwater Ecology and Biotechnology, Institutes of Hydrobiology,  
Chinese Academy of Sciences, Wuhan, Hubei, P. R. China, 430072;

<sup>3</sup> School of Biomedical Sciences, The Chinese University of Hong Kong, Shatin, Hong Kong, P.  
R. China.

<sup>4</sup> Lillehei Heart Institute, University of Minnesota, Minneapolis, USA

\* Correspondence and requests for materials should be addressed to Wei Hu (email:

[huwei@ihb.ac.cn](mailto:huwei@ihb.ac.cn))

**File S1- Analysis of *DMY*-TALENs microinjected embryos**

**A. Developmental analysis of *DMY*-TALENs microinjected embryos**

| <b>Concentration</b> |             | <b>Normal</b> | <b>Abnormal</b> | <b>Dead</b> | <b>Total embryos</b> |
|----------------------|-------------|---------------|-----------------|-------------|----------------------|
| <b>200pg</b>         | <b>Exp1</b> | 35            | 0               | 1           | 35                   |
|                      | <b>Exp2</b> | 32            | 0               | 0           | 32                   |
|                      | <b>Exp3</b> | 28            | 0               | 0           | 28                   |
| <b>400pg</b>         | <b>Exp1</b> | 57            | 2               | 3           | 62                   |
|                      | <b>Exp2</b> | 54            | 2               | 2           | 58                   |
|                      | <b>Exp3</b> | 48            | 1               | 4           | 53                   |
| <b>600pg</b>         | <b>Exp1</b> | 88            | 3               | 7           | 98                   |
|                      | <b>Exp2</b> | 79            | 1               | 6           | 86                   |
|                      | <b>Exp3</b> | 61            | 5               | 15          | 81                   |
| <b>800pg</b>         | <b>Exp1</b> | 18            | 6               | 28          | 52                   |
|                      | <b>Exp2</b> | 22            | 12              | 22          | 56                   |
|                      | <b>Exp3</b> | 25            | 10              | 27          | 62                   |

**B. Mutation rate of *DMY*-TALENs microinjected embryos**

| <b>Concentration</b> | <b>Exp1</b> | <b>Exp2</b> | <b>Exp3</b> | <b>Average mutation rate</b> | <b>SD</b> |
|----------------------|-------------|-------------|-------------|------------------------------|-----------|
| <b>200pg</b>         | 6.25%       | 6.45%       | 3.23%       | 5.31%                        | 0.01807   |
| <b>400pg</b>         | 25.00%      | 25.81%      | 21.88%      | 24.23%                       | 0.020765  |
| <b>600pg</b>         | 46.88%      | 38.71%      | 40.63%      | 42.07%                       | 0.042701  |
| <b>800pg</b>         | 46.88%      | 46.88%      | 45.16%      | 46.30%                       | 0.009894  |

**File S2- Analysis of *DMY*-UTR-TALENs microinjected embryos**

**A. Developmental analysis of *DMY*-UTR-TALENs microinjected embryos**

| <b>Concentration</b> |             | <b>Normal</b> | <b>Abnormal</b> | <b>Dead</b> | <b>Total embryos</b> |
|----------------------|-------------|---------------|-----------------|-------------|----------------------|
| <b>200pg</b>         | <b>Exp1</b> | 40            | 0               | 0           | 40                   |
|                      | <b>Exp2</b> | 35            | 0               | 0           | 35                   |
|                      | <b>Exp3</b> | 37            | 0               | 0           | 37                   |
| <b>400pg</b>         | <b>Exp1</b> | 39            | 1               | 1           | 41                   |
|                      | <b>Exp2</b> | 35            | 1               | 2           | 38                   |
|                      | <b>Exp3</b> | 39            | 2               | 2           | 43                   |
| <b>600pg</b>         | <b>Exp1</b> | 35            | 1               | 3           | 39                   |
|                      | <b>Exp2</b> | 38            | 2               | 2           | 42                   |
|                      | <b>Exp3</b> | 36            | 2               | 2           | 40                   |
| <b>800pg</b>         | <b>Exp1</b> | 22            | 6               | 20          | 48                   |
|                      | <b>Exp2</b> | 20            | 8               | 18          | 46                   |
|                      | <b>Exp3</b> | 21            | 9               | 19          | 49                   |

**B. Mutation rate of *DMY*-UTR-TALENs microinjected embryos**

| <b>Concentration</b> | <b>Exp1</b> | <b>Exp2</b> | <b>Exp3</b> | <b>Average mutation rate</b> | <b>SD</b> |
|----------------------|-------------|-------------|-------------|------------------------------|-----------|
| <b>200pg</b>         | 6.45%       | 6.67%       | 6.45%       | 6.52%                        | 0.001242  |
| <b>400pg</b>         | 25.00%      | 29.03%      | 23.33%      | 25.79%                       | 0.029301  |
| <b>600pg</b>         | 40.63%      | 41.94%      | 43.33%      | 41.96%                       | 0.013544  |
| <b>800pg</b>         | 50.00%      | 48.39%      | 46.88%      | 48.42%                       | 0.015628  |

**File S3. Mismatch seq of *DMY* gene in genome**

| Subject        | Span | Start1   | End1     | Mis1 | Match_Seq1          | Start2   | End2     | Mis2 | Match_Seq2         | Sum_MM |
|----------------|------|----------|----------|------|---------------------|----------|----------|------|--------------------|--------|
| scaffold1535   | 17   | 25405    | 25422    | 0    | TAGTCCAGAGGCCTCGTC  | 25439    | 25456    | 0    | GTGAAGAATGAAGCCGGA | 0      |
| ultracontig107 | 17   | 171535   | 171552   | 0    | TAGTCCAGAGGCCTCGTC  | 171569   | 171586   | 1    | GTGAAGAATGAAGCTGGA | 1      |
| 3              | 12   | 36197357 | 36197374 | 3    | TCGTCCAGAGTCTTCGTC  | 36197386 | 36197403 | 4    | GTGACGAAGGAAGTCAGA | 7      |
| 15             | 1    | 9611512  | 9611529  | 5    | TTTTCCAGATGGCTTGTC  | 9611530  | 9611547  | 4    | GTGATGAATGAGGCGGCA | 9      |
| 15             | 60   | 14478145 | 14478162 | 4    | TAGTCCATAGGCTCTGTC  | 14478222 | 14478239 | 5    | CTGTTGAAGGAAGCTGGA | 9      |
| 15             | 88   | 22629616 | 22629633 | 4    | TAGTTCAGAGGACTGGTG  | 22629721 | 22629738 | 5    | CAGAAGATTGAAGCGGCA | 9      |
| 16             | 49   | 302443   | 302460   | 5    | TAGTTCAGAGGACTGGTG  | 302509   | 302526   | 4    | CTTAAGAATGAAACCAGA | 9      |
| 17             | 54   | 30925606 | 30925589 | 5    | TGGTCCAGAGGACTGGTG  | 30925535 | 30925518 | 4    | GTGTAGAAAGAAGACTGA | 9      |
| 20             | 77   | 4926137  | 4926154  | 5    | TAGTCCAAAACCTGGTA   | 4926231  | 4926248  | 4    | CTGAAGCAGGAAGCCTGA | 9      |
| 4              | 77   | 26072027 | 26072044 | 5    | TAGGTCCAGAGAGCTCTTC | 26072121 | 26072138 | 4    | GTTAATAATAAAGCCGAA | 9      |
| 4              | 85   | 3503679  | 3503696  | 5    | TGGCCCAGAGGCTCCATC  | 3503781  | 3503798  | 4    | CTGTAGAAGGAAGCTGGA | 9      |
| 5              | 58   | 19144433 | 19144416 | 4    | TAGTCCAGATGCTCCGTA  | 19144358 | 19144341 | 5    | CTGAAAGATGAAGCTGCA | 9      |
| 9              | 38   | 4858611  | 4858594  | 4    | TAGTCAAGAGGGGTCGGC  | 4858556  | 4858539  | 5    | GTCAAGAGTGCAGCAGCA | 9      |
| 10             | 100  | 18240628 | 18240645 | 5    | TAGTTGGGAGTCCTCCTC  | 18240745 | 18240762 | 5    | GTGAAAAATGTGTCTGGA | 10     |
| 10             | 93   | 11445563 | 11445580 | 5    | TAGTAGGGACTCCTCGTC  | 11445673 | 11445690 | 5    | GAGATGAAGGAGGCAGGA | 10     |
| 12             | 65   | 19216392 | 19216409 | 5    | TAGTCTAAAGACGTCCTC  | 19216474 | 19216491 | 5    | GAGAAGAAGGAAGACCCA | 10     |
| 13             | 51   | 24810791 | 24810808 | 5    | TCCTCCAGCGGCCTTGTT  | 24810859 | 24810876 | 5    | GAAAACAATGAAGTTGGA | 10     |
| 14             | 93   | 9245601  | 9245618  | 5    | TGGTCGATAAGCCTCATC  | 9245711  | 9245728  | 5    | ATGAAGAGCGAAGGCCGA | 10     |
| 15             | 24   | 15029228 | 15029245 | 5    | TATCCAGAGGCTTGGGG   | 15029269 | 15029286 | 5    | GTCAAGACAGAAGGAGGA | 10     |
| 15             | 26   | 6978961  | 6978944  | 5    | TAGTCCAGAGTCTTCACT  | 6978918  | 6978901  | 5    | CTGAAGATGGAAGCAGAA | 10     |
| 15             | 40   | 1340005  | 1340022  | 5    | TGGACCAGAGGCTGAGC   | 1340062  | 1340079  | 5    | TTGAGGATAGCAGCCGGA | 10     |
| 16             | 13   | 21231925 | 21231908 | 5    | TAATCCAAACGCTTCTTC  | 21231895 | 21231878 | 5    | TTGCAGAATGAAGTAGAA | 10     |
| 16             | 15   | 13648743 | 13648760 | 5    | TTGTCCAGGAACCTCATC  | 13648775 | 13648792 | 5    | GCTGAGAATGCAGCCAGA | 10     |
| 16             | 73   | 19887374 | 19887391 | 5    | TAGGTCCAGAGTCTTCGCT | 19887464 | 19887481 | 5    | GTTGAGAATTAAGGAGGA | 10     |
| 16             | 94   | 17991283 | 17991300 | 5    | TTCTTCAGAGACCTCATC  | 17991394 | 17991411 | 5    | GTCAACAATAAAGCCACA | 10     |
| 17             | 38   | 30706131 | 30706114 | 5    | TTGGCCAGAGGACGCGGC  | 30706076 | 30706059 | 5    | GTGGAGACAGAACTGGA  | 10     |
| 20             | 6    | 12281682 | 12281665 | 5    | TATCCAGGGGCGACGAC   | 12281659 | 12281642 | 5    | CAGTAGAATGAAGCCTCA | 10     |
| 21             | 44   | 16629309 | 16629292 | 5    | TCCTCCGCAGGCCTCGAC  | 16629248 | 16629231 | 5    | GTGAAGGCGGAAGCGGAA | 10     |
| 23             | 41   | 1158397  | 1158414  | 5    | TCCATCAGAGGCCACGTC  | 1158455  | 1158472  | 5    | GTAAAACTGAGGCAGGA  | 10     |

|                |    |          |          |   |                     |          |          |   |                     |    |
|----------------|----|----------|----------|---|---------------------|----------|----------|---|---------------------|----|
| 3              | 54 | 31811293 | 31811310 | 5 | TATCCAAGAGGCTTTGTC  | 31811364 | 31811381 | 5 | GTCAAACCTGAAGCAGGA  | 10 |
| 3              | 64 | 7659857  | 7659874  | 5 | TTGTGCAGCTGCCTCTTC  | 7659938  | 7659955  | 5 | GTGAAGAAGAAAAGAAAGA | 10 |
| 4              | 30 | 18941030 | 18941047 | 5 | TAGACCTGACAGCTCGTC  | 18941077 | 18941094 | 5 | GGAAAAAATGAAATCGGA  | 10 |
| 4              | 63 | 9288293  | 9288310  | 5 | TAGCCCTGATTCCCTCGCC | 9288373  | 9288390  | 5 | GTGAAAACAGAAGCCCAA  | 10 |
| 4              | 86 | 21922241 | 21922224 | 5 | TAGCTCTGCAGCCTCGTC  | 21922138 | 21922121 | 5 | GTAAACAATGGAGCTGCA  | 10 |
| 5              | 45 | 33730066 | 33730083 | 5 | TTCCCCAGAAGCGTCGTC  | 33730128 | 33730145 | 5 | CTGAGGAAGGAAGCAGAA  | 10 |
| 5              | 79 | 9163864  | 9163881  | 5 | TGGTCCAGAGCCCTCTGA  | 9163960  | 9163977  | 5 | GTGAACAAAGAAGGAGCA  | 10 |
| 5              | 97 | 8639758  | 8639775  | 5 | TAGACAAGACACCTCTTC  | 8639872  | 8639889  | 5 | GGGAAGACTGAATCTGCA  | 10 |
| 6              | 2  | 17717317 | 17717334 | 5 | TAGCCCATCGGGCTCGGC  | 17717336 | 17717353 | 5 | CAGAAGAAAGAAGCTGCA  | 10 |
| 6              | 34 | 7035613  | 7035630  | 5 | TTGTCCTTAGGCCTCTTT  | 7035664  | 7035681  | 5 | GTTCAGAATGCACCCTGA  | 10 |
| 6              | 56 | 12066847 | 12066830 | 5 | TAGCTCAAAGGCCTTGTC  | 12066774 | 12066757 | 5 | GTGATGAAGGATCCAGGA  | 10 |
| 6              | 95 | 13846644 | 13846661 | 5 | TGATTCCAGAGGCATCGTG | 13846756 | 13846773 | 5 | GCTGAGAATGAAGTGGGA  | 10 |
| 7              | 66 | 11600912 | 11600929 | 5 | TAATCCAGAGGCCATCTG  | 11600995 | 11601012 | 5 | GGAAAGAAAGAAGCCAAA  | 10 |
| 8              | 41 | 23642320 | 23642337 | 5 | TAGTCCAGAGGCAATGCA  | 23642378 | 23642395 | 5 | TTGCAGAATGGAGCAAGA  | 10 |
| 8              | 47 | 7846284  | 7846301  | 5 | TATCCAAGAGGCTTTGTC  | 7846348  | 7846365  | 5 | GGGAGGAGTCAGGCCGGA  | 10 |
| 8              | 52 | 16640624 | 16640607 | 5 | TCCTCCAGATGCTTCATC  | 16640555 | 16640538 | 5 | GTGACGAAATAAAAACGGA | 10 |
| 8              | 81 | 23051150 | 23051133 | 5 | TATACCAGCGACCGCGTC  | 23051052 | 23051035 | 5 | GAGACGAATGAAGGCAAA  | 10 |
| 9              | 5  | 22638091 | 22638108 | 5 | TGATCCAGAGGCCAGCTC  | 22638113 | 22638130 | 5 | GAGGAAAATGAAGACGTA  | 10 |
| 9              | 94 | 18472017 | 18472034 | 5 | TTGTGAAGTGGCCTTGTC  | 18472128 | 18472145 | 5 | CTTAAAAATGACGCAGGA  | 10 |
| scaffold2835   | 32 | 8513     | 8530     | 5 | TACTTTAGACGCCGCGTC  | 8562     | 8579     | 5 | GCGAGTCCTGAAGCCGGA  | 10 |
| scaffold5477   | 66 | 2839     | 2822     | 5 | TAATGCAGCCTCCTCGTC  | 2756     | 2739     | 5 | ATGAAGGTTGAAGCCAAA  | 10 |
| scaffold907    | 67 | 61912    | 61929    | 5 | TAATGCAGCCTCCTCGTC  | 61996    | 62013    | 5 | ATGAAGGTTGAAGCCAAA  | 10 |
| scaffold907    | 67 | 63384    | 63401    | 5 | TAATGCAGCCTCCTCGTC  | 63468    | 63485    | 5 | ATGAAGGTTGAAGCCAAA  | 10 |
| ultracontig101 | 11 | 52819    | 52802    | 5 | TAGTCCATGGGCGGCGCC  | 52791    | 52774    | 5 | GTGAAGAAAAAGGATGGA  | 10 |
| ultracontig115 | 3  | 4532294  | 4532277  | 5 | TACTCCTGAAGCCTTTTC  | 4532274  | 4532257  | 5 | TGGAAGAATATAGCCGCA  | 10 |
| ultracontig257 | 24 | 630660   | 630643   | 5 | TAATCCTGAGCCCTCCTG  | 630619   | 630602   | 5 | GAGAAGAAATAAGCTGCA  | 10 |
| scaffold907    | 67 | 61912    | 61929    | 5 | TAATGCAGCCTCCTCGTC  | 61996    | 62013    | 5 | ATGAAGGTTGAAGCCAAA  | 10 |

## File S4-Mismatch analysis of *DMY*-TALEN sites

Subject 1: Dmrt1 , ultracontig107

Primer:

Mis-107F 5'-CACTGTCCTTGAAGGTGTTTCTC-3'

Mis-107R 5'-TCCGATCAGAATGAACCCAGTG-3'

Prediction target 1:

TAGTCCAGAGGCCTCGTC CGGCCCTGAAGTGACGGTGAAGAATGAAGCTGGA

Sequencing data:

CACTGTCCTTGAAGGTGTTTCTCTATATCTGTCAAATCAAACCATCATCAATCATCAA  
CCAAACCTCATTGTACAGATGTGTCTCTGCTCAGGTCGCCTTGAGGAGGCAGCAGGCT  
CAAGAGGAGGAGCTTGGGATTTGTAGTCCAGAGGCCTCGTC CGGCCCTGAAGTGACGGT  
GAAGAATGAAGCTGGAGCCGACTGTCTCTTCTCCATGGAGGGGCGATCCGGCACGCCAG  
GCGTCCCCCAACCCTCTGTCTGCCGAGGTACAGCTTTTCACTGGGGTTCATTCTGAT  
CGGACTTTTCCCAA

Subject 2: Chromosome: MEDAKA1:3:36196800:36198000:1

Primer:

Mis-Chr3F 5'-AATCAGCTCGCTGCTCCTGGTTC-3'

Mis-Chr3R 5'-CCACTCCCACAGCCACTTAAATC-3'

Prediction mismatch target 2:

TGTCCAGAGTCTTCGTCAGCGTTTGACGGTGAAGAAAGTCAAGA

Sequencing data:

TAAATCAGCTCGCTGCTCCTGGTTCACATGAAACGCAAAGACGATAAACATAAGAGTTCT  
GATGTGTCAAATGGTTTTTATTGGATTATTTTGTGAAACTACAATAAAATCATCAAAGGT  
TCTGAAGGGAACCGGCATTTTTAGAGCATCACTTCTCCTTTTATTTCAAATGTTTCCAAA  
TAAAAGCAGATCTCATGTCCCCAAAACGCCCGTGTTTAGGTTTCTCAGCCTCTGACCACA  
GTAGGAACATTCAATACCACCTTAACTACAGCTACTAGCTGCAGAAACCTGTTAACCA  
ACCCAGATGATCTGGGAGTTTCTTGCTGCTTTTCTCCGTCATTAATTGTTGTTTTCCCTT  
AAAAAAGATTTTATGAAGTGAGCATCTTGTCCAGAGTCTTCGTCAGCGTTTGACGGTG  
ACGAAGAAAGTCAAGAGGAGCTTGCATGAAGTCAGAGCTGCCGAGCTCCACAGGCACCT  
GAAGGCAACACGAGTTCATGATGATTAAAGTGGCTGTGGGAGTGGTTCCCAA

## File S5-Mismatch prediction of DMY TALEN L and R sites using BLAST

### A. Mismatch prediction of DMY TALEN L sites using BLAST

# blastn

# RID: 1FFC9U95015

# Database: GPIPE/8090/100/ref\_top\_level

# Fields: query id, subject ids, % identity, alignment length, mismatches, gap opens, q. start, q. end, s. start, s. end, evalue, bit score

# 1526 hits found

*Oryzias latipes (Japanese medaka) genome view*  
Annotation Release 100 statistics

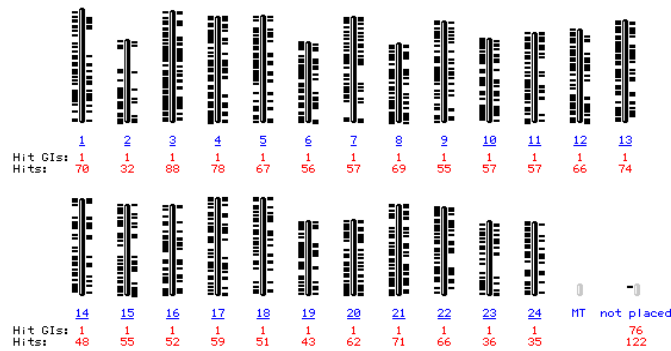

### B. Mismatch prediction of DMY TALEN R sites using BLAST

# blastn

# RID: 1FGEH5WM014

# Database: GPIPE/8090/100/ref\_top\_level

# Fields: query id, subject ids, % identity, alignment length, mismatches, gap opens, q. start, q. end, s. start, s. end, evalue, bit score

# 3493 hits found

*Oryzias latipes (Japanese medaka) genome view*  
Annotation Release 100 statistics

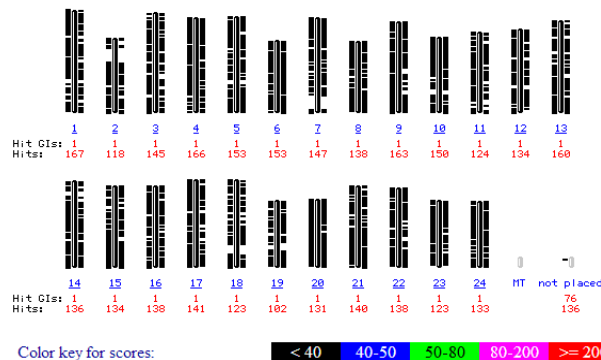

**File S6- The raw reads of RNA seq. matched species genomic sequences**

| <b>Species</b>                | <b>Gene Numbers</b> | <b>Percentage</b> |
|-------------------------------|---------------------|-------------------|
| <b>Oryzias latipes</b>        | 58114               | 75.93%            |
| <b>Oreochromis niloticus</b>  | 8145                | 10.64%            |
| <b>Takifugu rubripes</b>      | 2098                | 2.74%             |
| <b>Danio rerio</b>            | 1496                | 1.95%             |
| <b>Tetraodon nigroviridis</b> | 1460                | 1.91%             |
| <b>other</b>                  | 5228                | 6.83%             |

From BGI Transcriptome Assembly Analysis Report



**File S7- Quantitative analyses of gene expression levels in wild-type and *DMY* mutants**

**A. Genes and primers list in quantitative analyses**

| <b>Detector</b>  | <b>Primer Name</b> | <b>Primer sequence (5'-3')</b> | <b>Amplicon size(bp)</b> |
|------------------|--------------------|--------------------------------|--------------------------|
| <b>VASN</b>      | VASN-F             | TGTCATCATTTACGGCAGGT           | 135                      |
|                  | VASN-R             | ACAATAGGGCGGCGGTCAG            |                          |
| <b>TEKT2</b>     | TEKT2-F            | ATTGATAAATCCTGCCTGACTC         | 139                      |
|                  | TEKT2-R            | CCTCGGCTTGGACCACAT             |                          |
| <b>BAZ1B</b>     | BAZ1B-F            | CGCAGTGGACGAAGAGTGT            | 147                      |
|                  | BAZ1B-R            | TTGTCTGCTGGACGGTGAGT           |                          |
| <b>EAF1</b>      | EAF1-F             | GCGAATTTGTACTGGAGAAGC          | 109                      |
|                  | EAF1-R             | GCTGGAACGAACCGACTGC            |                          |
| <b>SRSF7</b>     | SRSF7-F            | TCTCTGTGGGTCCCGTGTT            | 138                      |
|                  | SRSF7-R            | GCAGTCGTAGGCATAGTGGC           |                          |
| <b>CCR7</b>      | CCR7-F             | TCTGGGTGATGGCACTGAT            | 126                      |
|                  | CCR7-R             | CTATTTGGCTGGCTTGGAT            |                          |
| <b>GAS1B</b>     | GAS1B-F            | CTCCGAATCCCAACCACC             | 133                      |
|                  | GAS1B-R            | CACTTCTTCCGCTCACCCT            |                          |
| <b>CYP21A2</b>   | CYP21A2-F          | TCCAAAGTACAGCGACAGAC           | 144                      |
|                  | CYP21A2-R          | CTTGGGAATGAAGAAACCTG           |                          |
| <b>SLC25A38B</b> | SLC25A38B-F        | AAGAACAACGCCAAACCG             | 122                      |
|                  | SLC25A38B-R        | ATGCAGCGCACGAACGAC             |                          |
| <b>RAPGEF6</b>   | RAPGEF6-F          | TCCAACCCTGCTGACATTC            | 112                      |
|                  | RAPGEF6-R          | CGTGGGCAACAACATCCTT            |                          |
| <b>ZBTB16B</b>   | ZBTB16B-F          | CCAACCTCAACAATCCCCTCA          | 109                      |
|                  | ZBTB16B-R          | GAACCTCCTGGCCGTCCACT           |                          |
| <b>EGFR</b>      | EGFR-F             | GTTCAAGAAGGTCAGGGTGC           | 137                      |
|                  | EGFR-R             | GATTTGCTTTGGGTGATGTG           |                          |

## B. Quantitative analyses of gene expression levels in wild-type and *DMY* mutants

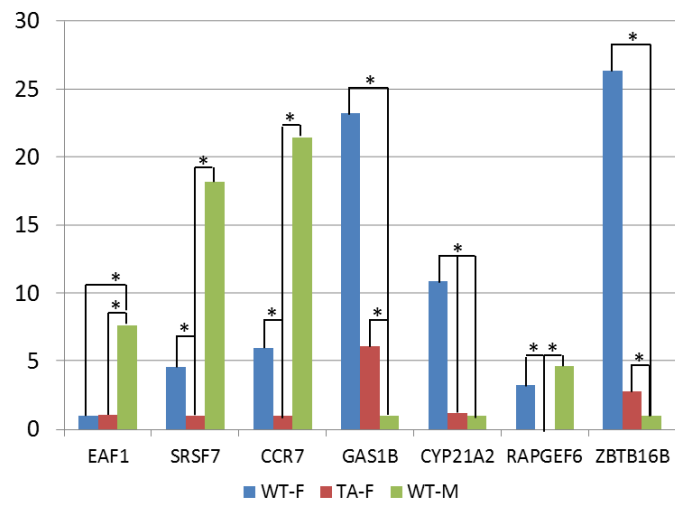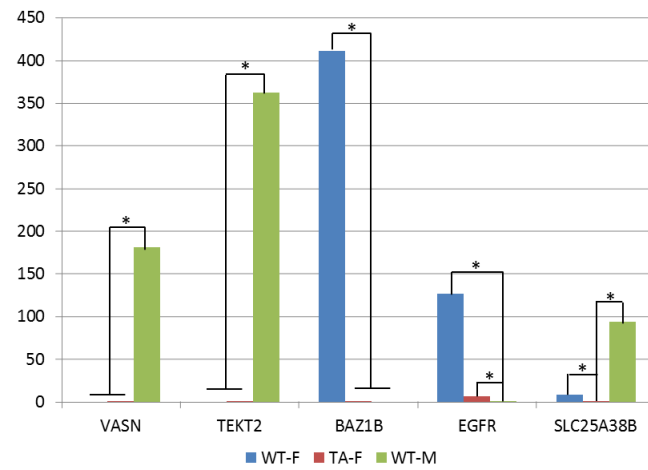

## File S8. Seventy-three testis-specific transcripts

### Symbol (Accession No.)

CAMSAP1(ENSORLT00000006610)  
ENSORLG00000007661(ENSORLT00000009599)  
SLC7A7(ENSORLT00000009096)  
C14ORF164(ENSORLT00000015302)  
CAMSAP1(ENSORLT00000006606)  
OSBPL5(ENSORLT00000019505)  
ABCA12(ENSORLT00000020130)  
TRPC4(ENSORLT00000004411)  
TENC1(ENSORLT00000020623)  
OLA.1488(ENSORLT00000019670)  
ENSORLG0000001384(ENSORLT00000001720)  
TMEM19(ENSORLT00000021540)  
ENSORLG00000006512(ENSORLT00000008177)  
NCALD(ENSORLT00000003223)  
TOMM40L(ENSORLT00000007387)  
PRKAG3(ENSORLT00000022812)  
ERBB2(ENSORLT00000007171)  
ENSORLG00000015199(ENSORLT00000019048)  
ENSORLG00000004673(ENSORLT00000005884)  
IPO4(ENSORLT00000008108)  
GLYR1(ENSORLT00000021809)  
GDAP2(ENSORLT00000010463)  
KIAA0556(ENSORLT00000010238)  
SH3GLB1(ENSORLT00000007331)  
IGSF10(ENSORLT00000007507)  
MYO18B(ENSORLT00000001441)  
SYNPR(ENSORLT00000010350)  
ENSORLG00000012978(ENSORLT00000016270)  
IPO4(ENSORLT00000008109)  
CCR7(ENSORLT00000003263)  
KATNAL1(ENSORLT00000014567)  
CELSR2(ENSORLT00000000241)  
MBD3(ENSORLT00000006112)  
OLA.7087(ENSORLT00000021541)  
ENSORLG00000015199(ENSORLT00000019050)  
CENPQ(ENSORLT00000006321)  
LARP7(ENSORLT00000006284)  
ENSORLG0000000409(ENSORLT00000000502)  
PGLYRP2(ENSORLT00000020477)  
RBFOX2(ENSORLT00000005359)  
RHBDD3(ENSORLT00000008440)  
PRTG(ENSORLT00000006771)

YSK4(ENSORLT00000022706)  
ARIH1(ENSORLT00000008952)  
KIAA0556(ENSORLT00000010234)  
PRPH2(ENSORLT00000004176)  
HELLS(ENSORLT00000001208)  
IGSF9(ENSORLT00000015259)  
ENSORLG00000007035(ENSORLT00000008841)  
CTRL(ENSORLT00000008071)  
ANAPC10(ENSORLT00000003568)  
SYNE1(ENSORLT00000018391)  
ENSORLG00000001898(ENSORLT00000002364)  
SRSF7(ENSORLT00000000918)  
ZNF800(ENSORLT00000016565)  
ATF4(ENSORLT00000016836)  
TEAD1(ENSORLT00000009328)  
PROSER1(ENSORLT00000005940)  
DCTN4(ENSORLT00000008931)  
TMEM63C(ENSORLT00000020354)  
SHISA2(ENSORLT00000011367)  
PROS1(ENSORLT00000006083)  
GOLGA2(ENSORLT00000008775)  
ENSORLG00000012019(ENSORLT00000015049)  
SHISA2(ENSORLT00000011369)  
ENSORLG00000010327(ENSORLT00000012941)  
RBP4(ENSORLT00000006390)  
ENSORLG00000007999(ENSORLT00000010038)  
NRAP(ENSORLT00000005987)  
ASH1L(ENSORLT00000000758)  
PRKCQ(ENSORLT00000021138)  
RGS3(ENSORLT00000008577)  
CRT3(ENSORLT00000000212)
